# Supplementary material
Source: PubMed Central journal article supplement (PMC4283797)
Supplement: NIHMS651985-supplement-leu2013317x1_pdf.pdf [file NIHMS651985-supplement-leu2013317x1_pdf.pdf]

**Supplementary Table 1: Distribution of iAMP21 cases according to Clinical Study Group**

| <b>Group</b>                                  | <b>Number of cases</b> | <b>Percentage</b> |
|-----------------------------------------------|------------------------|-------------------|
| BFM/Austria                                   | 21                     | 4.0               |
| BFM/Germany                                   | 46                     | 8.7               |
| CCG/USA                                       | 20                     | 3.8               |
| COG/USA                                       | 219                    | 41.3              |
| CoALL/Germany                                 | 8                      | 1.5               |
| EORTC/France and Belgium                      | 23                     | 4.3               |
| FRALLE/France                                 | 23                     | 4.3               |
| BFM/Israel                                    | 4                      | 0.8               |
| AIEOP/Italy                                   | 4                      | 0.8               |
| Leuven/Belgium                                | 4                      | 0.8               |
| NOPHO/Scandinavia                             | 17                     | 3.2               |
| POG/USA                                       | 10                     | 1.9               |
| St Jude/USA                                   | 3                      | 0.6               |
| Switzerland                                   | 10                     | 1.9               |
| NCRI CCLG/United Kingdom                      | 108                    | 20.4              |
| Munich Leukemia Laboratory, Germany           | 4                      | 0.8               |
| Semmelweis University of Medicine,<br>Hungary | 5                      | 0.9               |
| India                                         | 1                      | 0.2               |
| <b>Total</b>                                  | <b>530</b>             | <b>100</b>        |

**Supplementary Table 2: iAMP21 patient demographics, white blood cell count and karyotype**

| Patient No. | Age (years) | SEX | WCC ( $\times 10^9/l$ ) | Karyotype                                                                               |
|-------------|-------------|-----|-------------------------|-----------------------------------------------------------------------------------------|
| 1           | 7           | F   | 19                      | Fail                                                                                    |
| 2           | 12          | M   | 4.8                     | Fail                                                                                    |
| 3           | 9           | F   | 67.8                    | 46,X,del(X)(q24),t(7;12)(q22;q24),dup(21)(q21q22)                                       |
| 4           | 9           | M   | 3.6                     | 46,XY                                                                                   |
| 5           | 7           | F   | 3.9                     | 45,XX,-7,dup(21)(q21q22)[7]                                                             |
| 6           | 10          | F   | 8.8                     | 46,XX                                                                                   |
| 7           | 9           | F   | 6.9                     | 46,XX,t(3;16)(q21;q22~24),der(21)add(21)(p11)                                           |
| 8           | 11          | F   | 3.2                     | 46,XX,t(1;22)(q21;q11),add(11)(q25),del(11)(q23)                                        |
| 9           | 14          | M   | 42.4                    | 47,XY,+X,del(7)(q22),add(21)(q22)                                                       |
| 10          | 6           | M   | 24.9                    | 47,XY,+X,del(1)(q32),del(2)(p16),dup(21)(q21q22)                                        |
| 11          | 13          | F   | 3.4                     | 46,XX[23]                                                                               |
| 12          | 12          | F   | 10.7                    | 46,XX,-21,+mar                                                                          |
| 13          | 7           | F   | 5.2                     | 46,XX                                                                                   |
| 14          | 12          | F   | 1.2                     | 46,XX                                                                                   |
| 15          | 7           | F   | 2.8                     | 47~48,XX,+X,der(1;3)(p10;p10),+3,add(5)(q35),der(12)t(1?;12)(p22?;p13),+14,-21,+mar[cp] |
| 16          | 12          | F   | 5                       | 48,XX,+X,del(9)(q32),+10,der(13)t(1;13)(q21;q22),del(20)(q11),-21,+mar                  |
| 17          | 5           | M   | 13.2                    | 47,XY,+mar                                                                              |
| 18          | 15          | F   | 4.9                     | 45-49,XX,del(6)(q2?),add(9)(p24),add(11)(p15),-15,dup(21)(q?),1dmin                     |
| 19          | 8           | F   | 75.7                    | 46,XX,t(1;2)(q2?1,p2?1),del(5)(q15q33),add(8)(p23),dup(21)(q?)                          |
| 20          | 4           | M   | 1.8                     | 47,XY,+21c                                                                              |
| 21          | 16          | M   | 21.6                    | 46,XY,add(21)(q22)[5]                                                                   |
| 22          | 13          | F   | 3.3                     | 47~51,XX,der(7)(p?),+9,+?11,+?12,add(21)(q22),+22,+mar[cp16]                            |
| 23          | 5           | F   | 12.7                    | Fail                                                                                    |
| 24          | 8           | M   | 7.4                     | 45~46,XY,-6,-7,-9,-18,-21,+mar1~4,inc[cp3]                                              |
| 25          | 14          | M   | NA                      | 46,XY,add(21)(q22)[4]                                                                   |

|    |    |   |      |                                                                          |
|----|----|---|------|--------------------------------------------------------------------------|
| 26 | 9  | M | NA   | 45,XY,-7,add(21)(p11)[17]                                                |
| 27 | 10 | M | NA   | 46,XY,t(13;17)(q1?4;q25),-21,+mar[12]                                    |
| 28 | 5  | M | NA   | 40~47,XY,+X,inc[cp4]                                                     |
| 29 | 8  | M | NA   | 46,XY,del(9)(p13),add(21)(p11)[5]/46,idem,del(15)(q15)[3]                |
| 30 | 11 | M | 18.9 | 46,XY                                                                    |
| 31 | 8  | M | 11.7 | Fail                                                                     |
| 32 | 11 | F | 11.5 | 46,XX,del(11)(q23),inc[2]                                                |
| 33 | 7  | F | 4.2  | Fail                                                                     |
| 34 | 12 | M | NA   | Fail                                                                     |
| 35 | 7  | F | NA   | 46,XX,add(21)(q?)[4]/45,idem,add(11)(q2?4),inc[8]                        |
| 36 | 12 | F | NA   | 48,XX,add(19)(p13),ider(21)(q22),+mar1,+mar2,inc[9]                      |
| 37 | 8  | F | NA   | 46,X,der(X)(p2?),der(14)t(9;14)(q11;p10),add(16)(p13),dup(21)(q22)[cp17] |
| 38 | 9  | M | 1.6  | Fail                                                                     |
| 39 | 7  | F | 1.6  | Fail                                                                     |
| 40 | 6  | M | 25.8 | 47,XY,+X,del(20)(q11),-21,+mar[6]                                        |
| 41 | 8  | M | 11.5 | Fail                                                                     |
| 42 | 15 | M | 2    | Fail                                                                     |
| 43 | 6  | M | 8    | 46,XY,dup(21)(q22)[10]/51~54,idem,+X,+Y,+2,+4,+10,+mar1,+mar2,+mar3[cp5] |
| 44 | 8  | F | 17.7 | Fail                                                                     |
| 45 | 13 | M | 5.5  | 46,Y,add(X)(q?),add(21)(q11),inc[3]                                      |
| 46 | 2  | M | 8.6  | 47,XY,+dup(21)(q?)[2]                                                    |
| 47 | 7  | M | 3.3  | Fail                                                                     |
| 48 | 7  | M | 25.7 | 46,XY                                                                    |
| 49 | 10 | M | 5.6  | Fail                                                                     |
| 50 | 5  | M | 3.3  | 48,XY,+X,+14,-21,+mar,inc[7]/51,idem,+X,+8,+10,+18,inc[cp3]              |
| 51 | 5  | M | 41.1 | Fail                                                                     |
| 52 | 11 | M | 1.4  | Fail                                                                     |
| 53 | 8  | F | 7.9  | Fail                                                                     |
| 54 | 7  | F | 17.1 | 46,XX,mar[3]                                                             |

|    |    |   |      |                                                                                                                                    |
|----|----|---|------|------------------------------------------------------------------------------------------------------------------------------------|
| 55 | 10 | M | 1.7  | 49,XY,+X,dup(1)(q23q32),+i(7)(p?),add(11)(p?)-21,+2mar                                                                             |
| 56 | 12 | F | 3.6  | 46,XX,add(21)(q22)[15]                                                                                                             |
| 57 | 11 | F | 33.8 | Fail                                                                                                                               |
| 58 | 9  | F | 14.1 | Fail                                                                                                                               |
| 59 | 12 | M | 2.8  | 46,XY[20]                                                                                                                          |
| 60 | 3  | M | 2    | Fail                                                                                                                               |
| 61 | 7  | F | 0.7  | 46~47,XX,-2,-?15,?add(16)(q24),-21,+2~3mar[cp5]                                                                                    |
| 62 | 10 | F | 3.1  | 45~47,XX,+9,del(11)(q23),+mar,inc[cp9]                                                                                             |
| 63 | 10 | F | 35.6 | 46,XX,del(7)(q22),del(9)(p22),del(12)(p12),-21,+mar                                                                                |
| 64 | 8  | F | 31.8 | Fail                                                                                                                               |
| 65 | 5  | F | 0.7  | 47,XX,+X,t(7;15)(p15;q13),del(9)(p?22),add(10)(q?26),-21,+mar,inc[cp5]                                                             |
| 66 | 5  | M | 2.1  | Fail                                                                                                                               |
| 67 | 4  | M | 32.1 | 46,XY,dup(1)(q?),add(14)(q?),add(21)(q?)                                                                                           |
| 68 | NA | F | NA   | 46,XX,add(21)(q22)[10]/46,idem,-20,+mar[9]                                                                                         |
| 69 | NA | M | NA   | 46,XY,t(1;6)(p22;p21),add(16)(p13),-21,+mar[16]                                                                                    |
| 70 | NA | F | NA   | 48,XX,+X,t(6;12)(p21;p13),-21,+2mar[4]                                                                                             |
| 71 | NA | M | NA   | 45,XY,del(9)(p22),del(13)(q14),der(14)ins(14;21)(q13;q22)dup(21)(q22),add(16)(p13.3),-21,del(22)(q11.2)[13]                        |
| 72 | NA | F | NA   | 46,XX,t(2;14)(p11.2;q32),del(7)(q3?4),der(7)del(7)p1?5)add(7)(q?31),add(21)(q22)[cp8]                                              |
| 73 | NA | M | NA   | 47,XY,+8,-21,+mar[11]                                                                                                              |
| 74 | NA | M | NA   | 46,XY[20]                                                                                                                          |
| 75 | NA |   | NA   | Fail                                                                                                                               |
| 76 | NA | F | NA   | 47,XX,+X,add(9)(p21),i(9)(q10),r(21),+mar[17]                                                                                      |
| 77 | NA | F | NA   | 46,XX,del(14)(q24),der(21)add(21)(p11.2)add(21)(q22)dup(21)(q22)[15]                                                               |
| 78 | NA | F | NA   | 47,XX,+19,add(19)(p13.3),-21,+ider(?)t(?;21)(?;q22)dup(21)(q22q22)[3]                                                              |
| 79 | NA | F | NA   | 46,XX,add(6)(p21.3),t(9;11)(q34;q13),del(11)(q23),del(21)(q22),-22,+r(21)(q?)[2]                                                   |
| 80 | NA | F | NA   | 46,X,inv(X)(q13q21),der(17)t(7;17)(p11.2;p11.2),der(19)t(1;19)(q12;p13.3),dup(21)(q22)[4]/45,idem,-7[8]/45,idem,-7,i(8)(q10)[4]    |
| 81 | NA | F | NA   | 46,XX,t(5;6)(q31;q25),del(7)(q11.2q22),del(11)(q23q25),ider(21)(q10)dup(21)(q22q22),der(22)t(21;22)(q11.2;p11.2)dup(21)(q22q22)[5] |

|     |    |   |      |                                                                                                                                           |
|-----|----|---|------|-------------------------------------------------------------------------------------------------------------------------------------------|
| 82  | NA | M | NA   | 46,XY,+X,t(1;19)(p32;p13.3),t(5;8)(q31;q24.3),t(17;17)(q21;q25),add(21)(q?),+mar[cp16]                                                    |
| 83  | NA | M | NA   | 47,XY,+der(21)add(21)(p11.1)add(21)(q?21)[7]                                                                                              |
| 84  | NA |   | NA   | Fail                                                                                                                                      |
| 85  | NA | M | NA   | 47,XY,+21[3]                                                                                                                              |
| 86  | NA |   | NA   | Fail                                                                                                                                      |
| 87  | NA | M | NA   | 47,XY,der(16)t(1;16)(q2?3;p13.1),+21,inv qdp(21)(q22)[2]                                                                                  |
| 88  | 5  | F | NA   | 46,XX,add(21)(q22)[8]                                                                                                                     |
| 89  | 9  | F | NA   | Fail                                                                                                                                      |
| 90  | 13 | F | 9    | Fail                                                                                                                                      |
| 91  | 13 | M | NA   | Fail                                                                                                                                      |
| 92  | 10 | M | NA   | 46,XY,-21,+r,inc/46,idem,-8,+mar                                                                                                          |
| 93  | 9  | F | 0.7  | Fail                                                                                                                                      |
| 94  | 11 | F | 3.4  | Fail                                                                                                                                      |
| 95  | 5  | M | 2.2  | 47~48,XY,+X,+mar1,+mar2[cp8]                                                                                                              |
| 96  | 14 | M | 17.9 | 46,XY[27]                                                                                                                                 |
| 97  | 11 | F | 7.67 | 46,XX,t(1;5)(p31;q22),del(7)(q32q36),add(12)(p13),dup(21)(q21q22)[15]                                                                     |
| 98  | 16 | F | 1.1  | 46,XX,add(2)(p21),add(21)(q22)[9]                                                                                                         |
| 99  | 13 | F | 6.4  | 46,XX[30]                                                                                                                                 |
| 100 | 12 | M | 2.4  | 46,XY,der(21)dup(21)(p?)dup(21)(q?)[3]                                                                                                    |
| 101 | 10 | M | 13.4 | 47,XY,+X,del(13)(q14q22),dup(21)(q22)[cp3]                                                                                                |
| 102 | 14 | F | 2.3  | 47,XX,del(8)(p11.2p23),-15,del(16)(q12.1q22),-20,+21,add(21)(q22)x2,+2mar[14]/47,idem,del(17)(p11.2)[3]/47,XX,add(11)(q21),-13,+r,+mar[2] |
| 103 | 14 | M | 3.5  | 46,XY,add(2)(q13),t(7;15)(q32;q24),r(21)(q?),der(22)t(9;22)(q34;q11.2)add(22)(q11.2)[4]                                                   |
| 104 | 14 | M | 2.1  | 46,XY,ider(21)(q10)add(21)(q21)[12]                                                                                                       |
| 105 | 14 | M | 0.7  | 47,XY,+mar[cp2]                                                                                                                           |
| 106 | 9  | F | NA   | 46,XX,add(21)(q22)[3]                                                                                                                     |
| 107 | 13 | M | 3.3  | 46,XY,qdp(21)(q11.2q22)[6]                                                                                                                |
| 108 | 7  | F | 23.9 | 46,XX,+X,add(6)(p21.3),add(7)(q32),-11,add(21)(q22)[12]/46,idem,add(5)(q11.2),der(14)t(1;14)(q21;q22)[2]                                  |
| 109 | 9  | M | 4.24 | 47,XY,+X,add(2)(q35),der(5)ins(5;11)(q31;q13q14),del(11)(q13q23),del(12)(p12),der(21)dup(21)(p?q?)[8]                                     |

|     |    |   |       |                                                                                                                 |
|-----|----|---|-------|-----------------------------------------------------------------------------------------------------------------|
| 110 | 8  | F | 1.5   | 46,XX,i(17)(q10),add(21)(q22)[9]                                                                                |
| 111 | 7  | M | 172.5 | 46,Y,add(X)(p22.1),del(1)(q32q42),der(21)r(21)dup(21)(q22)[14]                                                  |
| 112 | 5  | M | 6.3   | 47,XY,+X,dup(21)(q?)[13]/47,idem,i(9)(q10)[5]                                                                   |
| 113 | 8  | M | 3.3   | 46,XY,-21,+mar[15]                                                                                              |
| 114 | 9  | F | 6.3   | 46,XX,add(2)(q35),del(7)(q32),inv(7)(q22q34),add(8)(p21),der(21)r(21)dup(21)(q22)[8]                            |
| 115 | 14 | F | 1.5   | 46,XX,dup(21)(q22)[2]                                                                                           |
| 116 | 9  | M | 1.4   | 46,XY,-21,+mar[20]                                                                                              |
| 117 | 5  | M | NA    | 46,XY,-21,+mar[4]/46,idem,add(9)(p13)[2]                                                                        |
| 118 | 5  | F | 31.2  | 46,XX,der(21)dup(21)(q22)del(21)(q22)[16]                                                                       |
| 119 | 8  | M | 1.3   | 48,XY,+X,+14,dup(21)(q?)[6]                                                                                     |
| 120 | 5  | F | 6.7   | Fail                                                                                                            |
| 121 | 8  | M | 1.1   | Fail                                                                                                            |
| 122 | 7  | M | 1.3   | 46,Y,t(X;9)(p22;q21.2),inv(2)(p14q23),der(19)t(1;19)(q21;p13),dup(21)(p11.2q22.3)[cp7]                          |
| 123 | 4  | M | 9.16  | Fail                                                                                                            |
| 124 | 9  | F | 64.1  | 46,XX,dup(21)(q?)[8]                                                                                            |
| 125 | 8  | F | 2.3   | 45,XX,add(1)(q42),-11,-15,der(15;22)(q10;q10),der(21)add(21)(p11.2)add(21)(q21),-22,add(22)(q13),+mar1,+mar2[6] |
| 126 | 3  | F | 6.8   | Fail                                                                                                            |
| 127 | 10 | F | 87.5  | 47,XX,+X,del(16)(q13),del(17)(p11.2),dup(21)(q?)[20]                                                            |
| 128 | 7  | F | 2.5   | 46,XX[25]                                                                                                       |
| 129 | 7  | F | 16.2  | 46,XX,add(21)(q22)[13]                                                                                          |
| 130 | 10 | F | 2.3   | 48,XX,+X,+7,add(7)(q11.2),i(9)(q10),-16,add(21)(q22),+mar[5]                                                    |
| 131 | 9  | M | 1     | 46,XY,ider(21)(q10)dup(21)(q22)[20]                                                                             |
| 132 | 7  | M | 3.9   | Fail                                                                                                            |
| 133 | 13 | M | 11.9  | 46,XY,-7,del(8)(p21p23),del(10)(q24),del(16)(q22),add(17)(p11.2),der(21)add(21)(p?)add(21)(q?)+mar[cp18]        |
| 134 | 13 | M | 14.4  | 46,X,-Y,dup(21)(q?)+mar[8]                                                                                      |
| 135 | 6  | M | 11.8  | Fail                                                                                                            |
| 136 | 7  | F | 7.41  | 46,XX,del(11)(q23),ider(21)(q10)trp(21)(q21q22)[15]                                                             |
| 137 | 9  | F | 4.5   | 46,XX,add(1)(q32),der(21)dup(21)(q?)r(21)(p11q22.3)[5]                                                          |

|     |    |   |       |                                                                                                                                                |
|-----|----|---|-------|------------------------------------------------------------------------------------------------------------------------------------------------|
| 138 | 8  | M | 29.41 | 46,XY,idel(21)(q22)[2]                                                                                                                         |
| 139 | 6  | F | 2     | 56,XX,+X,+4,+5,+6,+9,+10,+14,+17,+18,+20,dup(21)(q?) [7]/56,idel,dup(1)(q23q42)[3]                                                             |
| 140 | 15 | M | 2.3   | 45,XY,del(12)(p13),-14,i(14)(q10),add(21)(q22)[3]/46,idel,+mar[9]                                                                              |
| 141 | 6  | F | 2.9   | 46,XX,i(9)(q10),-21,+mar[cp3]                                                                                                                  |
| 142 | 15 | M | 15    | 46,XY,del(8)(p21),del(20)(q11.2q13.3),add(21)(q?) [14]                                                                                         |
| 143 | 14 | F | 3     | 46,XX,add(21)(q22)[3]                                                                                                                          |
| 144 | 13 | M | 5.3   | 45,XY,add(4)(q23),del(7)(q22),add(11)(q21),-14,-17,-19,der(21)add(21)(p11.2),+mar1,+mar 2[cp11]                                                |
| 145 | 9  | F | 20.1  | 45,XX,-8,del(13)(q12),-16,der(16)t(8;16)(q11.2;q12),add(20)(p11.2),idup(21)(q11.2q22)[13]                                                      |
| 146 | 12 | F | 3.9   | 45,XX,add(1)(p34),add(7)(q36),del(9)(q13q34),t(11;14)(p13;q11.2),-15,-15,der(16)t(16;21)(p13;q11.2),+add(21)(q22)[4]/45,idel,dup(1)(q21q32)[8] |
| 147 | 4  | F | 20.9  | 46,XX,add(7)(p22),add(16)(q12.1),r(21)[5]                                                                                                      |
| 148 | 14 | F | 0.3   | 46,XX[17]                                                                                                                                      |
| 149 | 17 | F | 7.3   | 46,XX,del(7)(q22q34),add(12)(p11.2),add(16)(p13.3),add(21)(p11.2)[cp18]                                                                        |
| 150 | 11 | M | 7.6   | 47,XY,dup(21)(q?),+r[10]                                                                                                                       |
| 151 | 5  | M | 17.5  | 46,XY,t(9;22)(q34;q11.2)[10]                                                                                                                   |
| 152 | 3  | F | 1.8   | 46,XX,idel(21)(q10)add(21)(q22)[2]                                                                                                             |
| 153 | 8  | F | 4.3   | 47,XX,+X,del(20)(q13.1q13.3),r(21)[7]                                                                                                          |
| 154 | 9  | M | 2.9   | Fail                                                                                                                                           |
| 155 | 6  | M | 3.9   | 46,XY,der(21)add(21)(p11.2)add(21)(q22)[3]/46,idel,add(19)(p13.3)[8]                                                                           |
| 156 | 7  | F | 8.5   | 46,XX,del(7)(q32),der(21)r(21)(q11.2q22.3)qdp(21)(q11.2q22.3)[14]                                                                              |
| 157 | 12 | F | 6     | 46,XX,der(21)add(21)(p11.1)add(21)(q22)[4]                                                                                                     |
| 158 | 6  | F | 164.6 | 46,XX,del(7)(p11.2),add(21)(p11.2)[19]                                                                                                         |
| 159 | 12 | M | 5.7   | 47,X,+X,-Y,del(10)(q22q24),add(21)(q22),+mar[13]/48,idel,+14[4]                                                                                |
| 160 | 6  | M | 3     | 45,XY,rob(15;21)(q10;q10)c[20]                                                                                                                 |
| 161 | 8  | M | 0.8   | Fail                                                                                                                                           |
| 162 | 13 | F | 6.2   | 47,XX,+X,del(12)(p11.2),add(21)(q22)[6]/47,idel,del(9)(p13)[2]                                                                                 |
| 163 | 7  | M | 7.7   | 47,XY,+X,der(21)add(21)(p11.2)add(21)(q22)[14]                                                                                                 |
| 164 | 7  | F | 6.1   | Fail                                                                                                                                           |
| 165 | 11 | F | 1.38  | 47,XX,+X,der(8)t(8;9)(p21;q22),dup(21)(q22q22)[1]                                                                                              |

|     |    |   |       |                                                                                                                                                                                |
|-----|----|---|-------|--------------------------------------------------------------------------------------------------------------------------------------------------------------------------------|
| 166 | 10 | M | 4.5   | 46,XY,add(21)(q22)[4]                                                                                                                                                          |
| 167 | 7  | M | 15.9  | 47,XY,+10,del(10)(q21),-21,+mar[16]                                                                                                                                            |
| 168 | 16 | M | 8     | 46,XY,add(21)(q22)[13]                                                                                                                                                         |
| 169 | 14 | F | NA    | 45,XX,del(6)(q21),-7,i(12)(q10),dup(21)(p?q?)[3]                                                                                                                               |
| 170 | 6  | F | 18.1  | 48,XX,+1,+10,del(12)(p11.2),del(17)(p11.2),-21,+mar[15]                                                                                                                        |
| 171 | 6  | M | 2.3   | 49,XY,+X,+9,add(15)(q22),+17[1]/51,idem,+Y,-9,+21,+r(21)[cp4]                                                                                                                  |
| 172 | 10 | F | 37.6  | 46,XX,der(3)add(3)(p25)add(3)(q29),dup(21)(q?)[8]                                                                                                                              |
| 173 | 5  | M | NA    | 47,XY,+X,qdp(21)(q11.2q22)[7]                                                                                                                                                  |
| 174 | 7  | F | 9.5   | 46,XX,dup(21)(q?)[1]                                                                                                                                                           |
| 175 | 6  | M | 1.5   | 46,XY,add(1)(q43),del(6)(q2?),add(21)(p11.2),add(22)(p11.2)[1]                                                                                                                 |
| 176 | 10 | M | 900   | 46,XY[20]                                                                                                                                                                      |
| 177 | 8  | F | 0.67  | 46,XX,r(21)(p11.2q22)c[21]/45,XX,-r(21)(p11.2q22)c[4]                                                                                                                          |
| 178 | 6  | F | 4.3   | 46,XX,add(21)(q22)[6]                                                                                                                                                          |
| 179 | 12 | F | 9.9   | 46,XX,add(21)(p11.2)[13]                                                                                                                                                       |
| 180 | 8  | M | 1.7   | 47,XY,+9,add(21)(q22)[2]                                                                                                                                                       |
| 181 | 12 | F | 1.1   | Fail                                                                                                                                                                           |
| 182 | 11 | F | 4.3   | 46,XX,add(21)(q22)[13]                                                                                                                                                         |
| 183 | 9  | F | 32.41 | 46,XX,der(12)inv(12)(p12p13)del(12)(p13p13),qdp(21)(q21q22)[10]                                                                                                                |
| 184 | 6  | F | 2.21  | 46,XX,add(6)(q13),t(11;12)(q21;q15),add(13)(q21),add(15)(q24),add(21)(q22)[20]                                                                                                 |
| 185 | 12 | F | 5.2   | 46,XX,der(17)t(1;17)(q21;q25),add(21)(q22)[9]/46,idem,add(19)(p13.3)[7]                                                                                                        |
| 186 | 7  | F | 3.3   | 46,XX,r(21)[1]                                                                                                                                                                 |
| 187 | 8  | M | 2.5   | 44,XY,der(7)t(7;15)(p15;q13)del(7)(q22q34),del(8)(p11.2),+der(12)del(12)(p?)del(12)(q?),dic(12;15)(p13;p13),dic(13;16)(q14;q12),-15,der(21)itrp(21)(q22)t(X;21)(p11.2;q22)[12] |
| 188 | 9  | M | 3.3   | Fail                                                                                                                                                                           |
| 189 | 11 | F | 10.4  | 46,XX,der(21)r(21)add(21)(q22)[15]                                                                                                                                             |
| 190 | 13 | F | 16.9  | 46,XX,der(21)add(21)(p12)add(21)(q22)[3]                                                                                                                                       |
| 191 | 15 | F | 1.9   | 46,XX,-21,+mar[2]                                                                                                                                                              |
| 192 | 11 | F | 2.4   | 47,XX,+X,ider(21)(q10)qdp(21)(q11.2q22)[4]                                                                                                                                     |
| 193 | 7  | F | 5.3   | 45,XX,dup(1)(q21q32),i(8)(q10),t(9;14)(p22;q11.2),der(11)(11pter->11q13::21q11.2->21q22::21q22-                                                                                |



|     |    |   |       |                                                                                                                  |
|-----|----|---|-------|------------------------------------------------------------------------------------------------------------------|
|     |    |   |       | >22q11.2::22q11.2->22q22::22q22->22q11.2:),-21[2]                                                                |
| 194 | 5  | M | 8.8   | 47,XY,+X,del(16)(p12),dup(21)(q22)[3]/47,idem,add(1)(q32)[5]/49,idem,+6,+14[2]                                   |
| 195 | 5  | F | 7.2   | 47,XX,+X,del(9)(p22),der(21)r(21)(p11.2q22.2)cqdp(21)(q11.2q22.2)[4]/48,idem,+22[2]/46,XX,r(21)(p11.2q22.2)c[14] |
| 196 | 4  | M | 1.5   | 46,XY,del(11)(q13q24),add(19)(p13.3),dup(21)(q22)[12]                                                            |
| 197 | 9  | F | 2.88  | 46,XX,dup(21)(q22)[6]                                                                                            |
| 198 | 12 | F | 0.9   | 46,XX[19]                                                                                                        |
| 199 | 18 | M | 2.1   | 48,XY,+X,add(1)(q32),del(9)(q12q22),del(11)(q21q23),+14,+21,dup(21)(q22)[3]                                      |
| 200 | 13 | M | 4     | 46,XY,del(19)(p13.3p13.3),qdp(21)(q?)[12]                                                                        |
| 201 | 14 | M | 3.2   | 46,XY[20]                                                                                                        |
| 202 | 8  | F | 3.1   | 46,XX[20]                                                                                                        |
| 203 | 19 | M | 2.1   | 47,XY,+X,dup(21)(q11.2)[9]                                                                                       |
| 204 | 5  | F | 12.5  | 45,XX,dic(4;20)(p12;q11.2),dup(21)(q22)[8]                                                                       |
| 205 | 9  | F | 1.6   | 46,XX,del(8)(q24),del(12)(p12),der(21)r(21)(p11.1q22)dup(21)(q?)[14]                                             |
| 206 | 15 | M | 8.9   | 46,XY[12]                                                                                                        |
| 207 | 15 | M | 4.6   | 46,XY,t(5;21;15)(q35;q11.2;q11.2)dup(21)(q22)[20]                                                                |
| 208 | 8  | F | 2.2   | 46,XX,qdp(21)(p11q22)[6]                                                                                         |
| 209 | 10 | M | 1.08  | 46,XY,del(9)(p13),dup(21)(q22)[3]                                                                                |
| 210 | 8  | M | 126.6 | 47,XY,+X,+r(21)dup(21)(q?)[18]                                                                                   |
| 211 | 5  | F | 4.7   | 45,XX,-7,r(21)[9]/45,idem,+7,-9,add(12)(q24.3)[11]                                                               |
| 212 | 18 | F | 1.8   | Fail                                                                                                             |
| 213 | 10 | M | 2.9   | 47,XY,+mar[10]                                                                                                   |
| 214 | 16 | F | 1     | 46,XX,add(4)(q27),add(16)(p11.2),dup(21)(q22)[8]/46,idem,del(16)(q11.2q24)[6]                                    |
| 215 | 11 | M | 4.8   | 45,XY,-7,dup(21)(q22)[5]                                                                                         |
| 216 | 9  | M | 17.4  | 46,XY,add(12)(q22),add(14)(q24),ider(21)(pter->q22::q22->q21::q21->q22::q22->pter)[11]                           |
| 217 | 8  | F | 1     | 46,XX,r(21)c                                                                                                     |
| 218 | 14 | F | 12.37 | 46,XX,del(11)(q22),dup(21)(q22)[2]                                                                               |
| 219 | 8  | F | 4.29  | 46,XX[20]                                                                                                        |
| 220 | 7  | F | 27.9  | 47,XX,del(21)(q22),+mar[3]                                                                                       |

|     |    |   |       |                                                                                                                                            |
|-----|----|---|-------|--------------------------------------------------------------------------------------------------------------------------------------------|
| 221 | 12 | F | 3.65  | 46,XX,add(19)(q13.3),der(21)r(21)dup(21)(q22)[8]                                                                                           |
| 222 | 12 | F | 18.9  | 47,XX,add(11)(q23),add(12)(p11.2),-21,add(22)(q13),mar1x2[13]/48,idem,+mar2[3]                                                             |
| 223 | 9  | F | 7.5   | 46,XX,dup(21)(q22)[2]                                                                                                                      |
| 224 | 20 | F | 2.3   | 46,XX,-21,+mar[12]                                                                                                                         |
| 225 | 9  | M | 12.9  | 46,XY,der(11)t(9;11)(q13;q21),der(18)t(11;18)(q21;q21),dup(21)(q22)[20]                                                                    |
| 226 | 15 | F | 68.7  | 46,XX,trp(21)(q11.2q22)[18]                                                                                                                |
| 227 | 16 | F | 5.4   | 46,XX,del(7)(q31),dup(21)(q13)[11]                                                                                                         |
| 228 | 10 | F | 4.8   | 47,XX,add(7)(q32),add(8)(p21),+9,i(9)(q10),-18,dup(21)(q22),+mar1[cp9]/50,idem,+5,+8,-add(8),+12,+mar2[4]                                  |
| 229 | 15 | F | 2.4   | 47,XX,-3,dup(3)(q13.2q25),trp(21)(q11.2q22),+2mar[4]/49,idem,+idic(10)(q11.2),+mar[14]                                                     |
| 230 | 15 | M | 77.3  | 46,XY,dup(21)(q22)[4]                                                                                                                      |
| 231 | 12 | M | 21.2  | 47,XY,+X,del(7)(q11.2q24),dup(21)(q22)[16]                                                                                                 |
| 232 | 14 | F | 5     | 45,XX,t(1;2)(p32;p21),der(8;13)(q10;q10),add(21)(q22)[15]                                                                                  |
| 233 | 15 | M | 1.72  | 46,XY,dup(21)(q22)[20]                                                                                                                     |
| 234 | 14 | M | 10.5  | 47,XY,add(9)(p13),del(9)(p13),add(19)(q13.3)x2,der(21)r(21)dup(q22),+mar[11]                                                               |
| 235 | 13 | F | 2.2   | 46,XX,del(7)(q32),inv(9)(p22q32),dup(21)(q21q22)[20]                                                                                       |
| 236 | 10 | M | 10.55 | 46,XY,qdp(21)(q21q22)[7]                                                                                                                   |
| 237 | 6  | M | 3.8   | 46,XY,ipsudic(21)(p11.2)dup(21)(q21)[10]/46,idem,t(7;8)(p13;p23),add(12)(p11.2)[2]                                                         |
| 238 | 5  | M | 2.43  | Fail                                                                                                                                       |
| 239 | 12 | F | 21.1  | 46,XX,del(7)(q22),der(21)add(21)(p11.2)add(21)(q22.1)dup(21)(q22)[14]                                                                      |
| 240 | 8  | F | 9.6   | 47,XX,+X,t(2;7)(p11.2;p21),dup(21)(q22)[17]                                                                                                |
| 241 | 17 | F | 2.68  | 46,XX,t(3;8)(q21;p23),del(7)(q21),qdp(21)(q21q22)[13]                                                                                      |
| 242 | 13 | F | 14.83 | 47,XX,+X,+mar1/48,idem,+mar1                                                                                                               |
| 243 | 4  | M | 3.93  | 48,XY,+X,+14,-21,+mar[3]                                                                                                                   |
| 244 | 7  | F | 25    | 46,XX,+3,der(8)t(3;8)(p11.2;p11.2),-11,-18,add(21)(q22),+mar[3]                                                                            |
| 245 | 10 | F | 8.3   | 45,XX,add(8)(q24.3),der(10)t(10;15)(q11.2;q11.2),-15,add(16)(p13.3),dup(21)(q22)[5]/45,idem,add(X)(p22.3),del(7)(q22),+8,-add(8)(q24.3)[2] |
| 246 | 9  | F | 15.4  | 47,XX,+X,add(21)(q22)[1]                                                                                                                   |
| 247 | 14 | F | 6.8   | 46,XX,add(1)(p36.3),-16,del(20)(q11.2q13.1),del(21)(q22),+der(21)r(21)dup(21)(q22)[20]                                                     |
| 248 | 6  | F | 11.3  | 47,XX,+X,der(21)r(21)dup(21)(q22)[16]                                                                                                      |

|     |    |   |      |                                                                                                                       |
|-----|----|---|------|-----------------------------------------------------------------------------------------------------------------------|
| 249 | 16 | F | 10.9 | 46,XX,dup(21)(q22)[4]                                                                                                 |
| 250 | 7  | F | 68.7 | 47,XX,+X,dup(21)(q22)[9]                                                                                              |
| 251 | 14 | F | 2.3  | 45,XX,-7,dup(21)(q22q22)[13]                                                                                          |
| 252 | 7  | M | 2.6  | 47,XY,+X,del(1)(q32),del(13)(q13q21),dup(21)(q11.2q22)[9]                                                             |
| 253 | 12 | F | 9    | 47,XX,+X,t(3;19)(q21;q13.4),dup(21)(q22)[6]                                                                           |
| 254 | 10 | M | 12.9 | 47,XY,+X,+14,dup(21)(q22)[3]/47,idem,t(2;2)(p21;p25)[3]/47,idem,t(2;2),del(6)(q13q21)[12]/47,idem,t(1;18)(p13;q21)[2] |
| 255 | 9  | F | 0.9  | 46,XX,add(21)(q22)[5]                                                                                                 |
| 256 | 19 | F | 3.4  | 46,XX[12]                                                                                                             |
| 257 | 9  | F | 2.1  | 46,XX,ider(21)(q10)dic(21;21)(q22;q22)hsr(21)(q22)[13]                                                                |
| 258 | 9  | F | 3.6  | 46,XX,del(13)(q11.2),der(21)add(21)(p11.2)add(21)(q22.1)dup(21)(q22)[1]/46,idem,del(6)(q25)[2]                        |
| 259 | 7  | F | 27.3 | 46,XX,dup(21)(q22)[12]                                                                                                |
| 260 | 10 | F | 3.7  | 45,XX,der(3)add(3)(p25)t(3;11)(q12;q13),-7,add(11)(q11),add(21)(q22)[11]                                              |
| 261 | 9  | M | 24   | 46,XY,t(2;4)(q37;q21),der(21)r(21)dup(21)(q22)                                                                        |
| 262 | 11 | M | NA   | 45,XY,t(2;16)(p13;p11.2),-8,der(11)t(8;11)(q11.2;q21),dup(21)(q22)[1]                                                 |
| 263 | 8  | F | 18.8 | 46,XX,r(21)dup(21)(q22)[8]/46,idem,del(9)(q22q32)[7]                                                                  |
| 264 | 23 | F | 5.7  | 47,XX,+X[2],-2,del(6)(q21)[2],del(7)(q32),del(9)(p13p22),dup(21)(q11.2q22),add(22)(p11.2),+mar[cp18]                  |
| 265 | 19 | F | 17.2 | 47,XX,+X,del(6)(q15q25),del(9)(p13),del(12)(p13),dup(21)(q22)[8]                                                      |
| 266 | 11 | M | 2.1  | 47,XY,+X,t(2;14)(p11.2;q11.2),del(11)(q22q23),-13,dup(21)(q22),+mar1/48,idem,+mar2                                    |
| 267 | 13 | F | 56.3 | 46,XX,-21,+mar[19]                                                                                                    |
| 268 | 11 | M | 4.1  | 46,XY,t(5;9)(q33;p22),der(21)r(21)dup(21)(q22)[8]                                                                     |
| 269 | 11 | F | 1.6  | 46,X,-X,t(3;12)(p13;p11.2),-21,+2mar[15]                                                                              |
| 270 | 7  | F | 15.2 | 46,XX,dup(21)(q11.2)[20]                                                                                              |
| 271 | 14 | M | 1.2  | 46,XY,der(17)t(1;17)(q11;p13),-21,+mar[7]                                                                             |
| 272 | 12 | F | 1.3  | 46,XX,dup(21)(q21)[cp3]                                                                                               |
| 273 | 16 | M | 7.4  | 45,XY,del(11)(q14q25),-13,dup(21)(q22)[6]                                                                             |
| 274 | 10 | M | 5    | 46,XY,der(21)r(21)dup(21)(q22)[6]/45,idem,-7[6]                                                                       |
| 275 | 14 | M | 1.7  | 47,XY,+X,del(15)(q24q26.1),der(21)r(21)(p11q22)dup(21)(q22)[3]                                                        |
| 276 | 17 | M | 9.5  | 46,XY,del(6)(q15q22),del(7)(q22),del(12)(q22q24),dup(21)(q22),der(22)t(21;22)(q21;p11.2)dup(21)(q22)[13]              |

|     |    |   |       |                                                                                                                                        |
|-----|----|---|-------|----------------------------------------------------------------------------------------------------------------------------------------|
| 277 | 12 | M | 7.8   | 46,XY,t(10;11)(q26;q13),dup(21)(q21.2q22.3)[3]/46,XY,t(10;11)(q26;q13),ider(21)(q10)dup(21)(q21.2q22.3)[4]                             |
| 278 | 17 | F | 4.5   | 46,XX[20]                                                                                                                              |
| 279 | 5  | M | 47.3  | 46,XY,add(21)(q22)[4]/47,idem,+X[11]                                                                                                   |
| 280 | 13 | M | 5.1   | 45,XY,-7,t(12;12)(p12;p13),der(21)dup(21)r(21)(::21p11.2->21q22::21q22->21q11.2::21q11.2->21q22::21q22->21q11.2::21q11.2->21qter::)[9] |
| 281 | 18 | M | 8.9   | 46,XY,der(6)ins(6;13)(q21;q12q22),der(12)t(12;13)(p12;q22),del(13)(q12),dup(21)(q22)[2]/48,idem,+X,+10[5]/48,idem,+del(X)(q13),+10[10] |
| 282 | NA | M | NA    | 49,XY,+X,+14,+21,dup(21)(q22)x2[cp18]/49,idem,der(16)t(1;16)(q23;q22)[6]/53,idem,+4,+6,+10,+11[4]                                      |
| 283 | NA | F | NA    | 46,XX[20]                                                                                                                              |
| 284 | 15 | M | 64    | 46,XY,der(21)add(21)(q22)[18]                                                                                                          |
| 285 | 14 | F | 1.3   | 46,XX,t(3;15)(q11.2;p12),der(21)add(21)(p13)dup(21)(q22)[4]                                                                            |
| 286 | 5  | M | 29.8  | 47,XY,+X,del(20)(q11.2q13.3),ider(21)(q10)add(21)(q11.2)[9]                                                                            |
| 287 | 14 | F | 6.4   | 45,X,add(X)(p22.1),del(1)(q41q43),add(17)(p11.2),der(21)add(21)(p11.1)dup(21)(q22)[8]                                                  |
| 288 | NA | M | NA    | 46,XY,del(6)(q13q21),add(19)(p13.3),dup(21)(q22),+mar1[8]                                                                              |
| 289 | NA | M | NA    | 46,XY,dup(1)(q12q42),del(16)(q21),der(21)add(21)(p11.2)dup(21)(q22)[2]                                                                 |
| 290 | NA | F | NA    | 47,XX,dup(21)(q22),+mar[2]                                                                                                             |
| 291 | 10 | F | 14.8  | 46,XX,add(21)(q22)[2]                                                                                                                  |
| 292 | 5  | M | 4.6   | 46,XY[20]                                                                                                                              |
| 293 | 9  | F | 2.1   | 46,XX,add(21)(q22)[4]                                                                                                                  |
| 294 | 7  | F | 3.2   | 46,XX,del(1)(q32q42),del(13)(q14),add(21)(q22)[10]                                                                                     |
| 295 | 6  | F | 5.5   | 46,XX[20]                                                                                                                              |
| 296 | 9  | F | 156.4 | 45,XX,der(9)add(9)(p21)t(9;22)(q34;q11.2),-11,r(21),der(22)t(9;22)[16]                                                                 |
| 297 | 8  | F | 1.8   | 46,XX,add(12)(p11.2),add(21)(q22)[7]                                                                                                   |
| 298 | 8  | F | 2.4   | 50,XX,+X,+4,+17,+21,der(21)idic(21)(p11.2)hsr(21)(q22)[cp16]                                                                           |
| 299 | 8  | F | 9.7   | 46,XX,add(21)(q22)[2]                                                                                                                  |
| 300 | 8  | F | 3.5   | 46,XX,inv(7)(p15q34),+8,der(16)t(1;16)(q21;q12-13),-20,i tan inv dup(21)(q11.2q22)[cp10]/46,idem,dup(2)(q13q37)[3]                     |
| 301 | 7  | F | 1.1   | 46,XX,add(21)(q22)[11]/46,idem,del(12)(p12)[4]                                                                                         |
| 302 | 7  | M | 3.5   | 46,XY,del(11)(q21),der(21)add(21)(p11.2)add(21)(q22)[3]                                                                                |

|     |    |   |      |                                                                                                                                                                                                             |
|-----|----|---|------|-------------------------------------------------------------------------------------------------------------------------------------------------------------------------------------------------------------|
| 303 | 7  |   | 25.3 | Fail                                                                                                                                                                                                        |
| 304 | 5  | M | 7.4  | 46,XY,+X,-20,add(21)(q22)[10]                                                                                                                                                                               |
| 305 | 7  | F | 4.8  | 46,XX,i(21)(q10)add(21)(q22)[20]                                                                                                                                                                            |
| 306 | 8  | F | 3.1  | 46,XX,der(17)t(1;17)(q21;p13),ider(21)(q10)inv(21)(q11.2q22)dup(21)(q22q22)[1]                                                                                                                              |
| 307 | 16 | M | 6.3  | 46,XY,t(9;22)(q34;q11.2),del(11)(q?21),add(21)(q22)[cp2]                                                                                                                                                    |
| 308 | 6  | M | 3.6  | 46,XY,der(21)r(21)dup(21)[14]                                                                                                                                                                               |
| 309 | 3  | M | 37.1 | 45,XY,+10,?dic(15;21)(21qter->21q22::21q22->21p11.2::15p11.2->15q11.2::21q11.2->21q22::dup21q22::15q22->15q26::?)[19]/46,XY[1]                                                                              |
| 310 | 9  | M | 5.5  | 46,XY,del(7)(q22q32),t(12;14)(q24.1;q11.2),add(21)(q22)[16]                                                                                                                                                 |
| 311 | 15 | F | 7.4  | 46,XX,del(11)(q23),der(21)add(21)(p11.2)add(21)(q22)[6]                                                                                                                                                     |
| 312 | 8  | F | 2.4  | 47,XX,+9,del(9)(p11),der(21)add(21)(p11.2)add(21)(q22)[11]                                                                                                                                                  |
| 313 | 13 | F | 65.8 | 46,XX,del(2)(p15p23),der(8)t(X;8)(p11.2;p21),dup(21)(q22)[20]                                                                                                                                               |
| 314 | 16 | M | 80.9 | 47,XY,+X,del(15)(q24),-21,+r[11]                                                                                                                                                                            |
| 315 | 3  | F | 133  | 46,XX,add(11)(q13~14),dup(21)(q21q22)[11]                                                                                                                                                                   |
| 316 | 13 | F | 4.77 | Fail                                                                                                                                                                                                        |
| 317 | 13 | F | 7.8  | 46,XX[20]                                                                                                                                                                                                   |
| 318 | 12 | F | 3.89 | Fail                                                                                                                                                                                                        |
| 319 | 6  | M | 19.1 | 46,XY[20]                                                                                                                                                                                                   |
| 320 | 10 | F | 5.7  | 46,XX,add(2)(p12)[7],der(8)(p?)[3],del(13)(q13q33)[7],ider(21)(q10)hsr(21)(q22)[cp7]                                                                                                                        |
| 321 | 17 | M | 7.5  | 46,XY,der(13;16)(q10;q10)[33]/47,XY,idem,-16,+der(13;16)(q10;q10),del(20)(q12),-21,+2mar[6]/45,XY,t(13;16),-der(13)t(13;16)[6]/47,XY,t(13;16)(q10;q10),-16,+t(13;16),del(20)(q12),-21,add(21)(q22),+2mar[2] |
| 322 | 4  | F | 1.4  | Fail                                                                                                                                                                                                        |
| 323 | 6  | M | 9.3  | 48,XY,+X,+6,add(21)(q21)[16]/48,idem,del(15)(q22)[4]                                                                                                                                                        |
| 324 | 8  | F | 1.8  | 46,XX,der(3)t(X;3),dup(21)(q?)[10]/45~46,XX,-4,dup(6)(q2?6),der(8)t(8;12),-11,der(16)t(1;16)(q25;q2?),der(17)t(15;17)(q?;?),dup(21)(q?)[cp7]                                                                |
| 325 | 12 | F | 8    | 46,XX[25]                                                                                                                                                                                                   |
| 326 | 15 | M | 2    | 46,XY,trp(21)(q11q22)[15]                                                                                                                                                                                   |
| 327 | 9  | M | 3.5  | 47,XY,+Y,add(21)(q22)[9]                                                                                                                                                                                    |

|     |    |   |       |                                                                                            |
|-----|----|---|-------|--------------------------------------------------------------------------------------------|
| 328 | 4  | M | 11.7  | 48,XY,+X,add(21)(q22),+mar[6]/46,XY,-7,der(11)t(11;13)(p12;q13),-13,add(21)(q22),+2mar[10] |
| 329 | 8  | F | 9.8   | 46,XX,add(6)(p21),del(7)(q31),del(10)(q24~25),i(21)(q10)[14]/47,idem,+mar[3]               |
| 330 | 12 | M | 8.1   | 47,XY,t(1;12)(q32;q23),t(2;9)(p12;q31),add(7)(p15),add(7)(q21),add(17)(p11),-21,+r,+mar[7] |
| 331 | 6  | F | 4.2   | 47,XX,+X,del(6)(q14q16),i(14)(q10),-21,+mar[10]                                            |
| 332 | 12 | M | 2.2   | 46,XY,inv(7)(p?15q?21),-21,+mar[2]                                                         |
| 333 | 7  | M | 3.2   | Fail                                                                                       |
| 334 | 13 | F | 19.2  | 47,XX,add(4)(q?31),del(7)(q3?2),i(21)(q?),+mar[5]                                          |
| 335 | 11 | F | 104.5 | 48,XX,+add(X)(q27),del(1)(q?41),del(21)(q11),+r[17]/49,XX,idem,+mar[3]                     |
| 336 | 7  | F | 8.15  | 46,XX,del(1)(p11),add(9)(p12),-15,+mar[19]                                                 |
| 337 | 8  | F | 20.3  | 46,XX,del(16)(q?),add(21)(q21)[9]/46,idem,del(1)(q31)[5]                                   |
| 338 | 8  | M | 0.9   | 48,XY,-7,+10,ider(21),+mar1,+mar2[14]                                                      |
| 339 | 6  | F | 38    | 47,XX,add(8)(q24),r(21),+mar[15]                                                           |
| 340 | 5  | M | 10.9  | 46,XY,r(21)[21]                                                                            |
| 341 | 8  | F | 0.9   | 48,XX,+X,del(21)(q?),+mar[12]                                                              |
| 342 | 6  | M | 2     | 46-47,XY,-8,-21,+2-3mar[cp7]/46-47,idem,add(16)(q2?3)[cp5]                                 |
| 343 | 6  | F | 7     | 48,XX,+X,+14,del(18)(q12q21),add(21)(q22)[16]                                              |
| 344 | 12 | M | 14    | 46,XY,add(21)(p11)[14]                                                                     |
| 345 | 12 | M | 4     | Fail                                                                                       |
| 346 | 19 | F | 10.1  | 46,XX,del(7)(p14p21),-21,+mar[10]                                                          |
| 347 | 12 | F | 2.8   | 46,XX,-21,+mar[9]                                                                          |
| 348 | 17 | M | 1     | 46,XY,add(1)(q25),add(21)(q21)[6]                                                          |
| 349 | 12 | M | 15.1  | 46,XY,-21,+mar[8]                                                                          |
| 350 | 6  | F | 5     | 46,XX,-7,dup(8),der(12),del(12),der(21)                                                    |
| 351 | 15 | M | 2.3   | 45,XY,add(15)(q26),-16[4]                                                                  |
| 352 | 12 | F | 2.6   | 46,XX,t(3;12)(p21;q21),add(21)(p10)[2]                                                     |
| 353 | 16 | M | 42    | 46,XY,del(9)(p12),add(19)(q13),der(21)[14]                                                 |
| 354 | 14 | M | NA    | 46,XY,add(9)(p13),dup(21)(q?)[9]/47,idem,+mar[11]                                          |
| 355 | 17 | M | 1.3   | Fail                                                                                       |
| 356 | 11 | M | 3.3   | 46,XY,add(21)(q22)[2]                                                                      |

|     |    |   |      |                                                                                                                                                                                                                     |
|-----|----|---|------|---------------------------------------------------------------------------------------------------------------------------------------------------------------------------------------------------------------------|
| 357 | 10 | M | 4    | 48~54,XY,der(21),+mar1,+mar2[cp12]                                                                                                                                                                                  |
| 358 | 10 | M | 23   | 46,XY,-21,+mar[8]                                                                                                                                                                                                   |
| 359 | 12 | F | 2    | 53~56,XX,add(1)(q?),+4,+6,add(6)(q?),+10,del(12)(p?),+14,+17,der(17),+20,+21,+22,+mar                                                                                                                               |
| 360 | 14 | M | 4.3  | 46,X,-Y,add(21)(q22),+mar[8]                                                                                                                                                                                        |
| 361 | 13 | F | 4    | 49,XX,+X,+6,+9 [9]                                                                                                                                                                                                  |
| 362 | 10 | F | 4    | 46,XX,der(19)t(1;19)(q2?1;q13),dup(21)(q?)[1]/46,idem,der(21)t(1;21)(q?21;q?22),inc[5]                                                                                                                              |
| 363 | 12 | M | 8    | Fail                                                                                                                                                                                                                |
| 364 | 16 | F | 5    | 46,XX,dup(21)(q11q22)[4]                                                                                                                                                                                            |
| 365 | 5  | F | 453  | Fail (SNP arrays)                                                                                                                                                                                                   |
| 366 | 7  | F | 73   | Fail (SNP arrays)                                                                                                                                                                                                   |
| 367 | 10 | M | 31   | Fail (SNP arrays, del(12)(p13-p13)(ETV6 exons 2-4)                                                                                                                                                                  |
| 368 | 10 | M | 245  | Fail (SNP arrays, del(12)(p13-p13)(ETV6 exons 2-3)                                                                                                                                                                  |
| 369 | 9  | F | 1    | 45,XX,-4,-11,del(17)(p12),add(19)(p13orq13),add(21)(q13),+mar[7]/90,idem x2[2]                                                                                                                                      |
| 370 | 12 | F | 2.4  | 45,XX,-3,der(7)t(7;8)(q31;q22),-8,-21,+mar1,+mar2[10]                                                                                                                                                               |
| 371 | 4  | M | 3.5  | 46,XY,+X,?i(3)(p10),rob(15;21)(q10;q10)c,-<br>rob(15;21),der(21)l(q10)ins(21;?)(q21;?)[2]/46~47,sl,del(6)(q22q24),del(7)(q31q35),-<br>15,+18[cp5]/45~46,sl,+10,-15,+21,add(22)(p13)[cp4]/45,XY,rob(15;21)(q10;q10)c |
| 372 | 5  | F | 3.2  | Fail                                                                                                                                                                                                                |
| 373 | 15 | F | 1.4  | Fail                                                                                                                                                                                                                |
| 374 | 12 | M | 2    | 46,XY,del(11)(q23q23),dup(21)(q22)                                                                                                                                                                                  |
| 375 | 7  | M | 30.7 | 47,XY,dup(21)(q22),+mar                                                                                                                                                                                             |
| 376 | 15 | M | 2.7  | 46,XY,t(2;17),der(8)t(8;16),der(12)t(12;21)dup(21)(q22),+14[11]                                                                                                                                                     |
| 377 | 5  | F | 6.6  | 47,XX,+X,dup(21)(q11q22)[19]                                                                                                                                                                                        |
| 378 | 17 | M | 3.4  | 46,XY,-21,+mar[4]                                                                                                                                                                                                   |
| 379 | 3  | M | 23   | 46,XY,t(6;17)(q?:q23),add(21)(q22)[8]                                                                                                                                                                               |
| 380 | 12 | M | 3.4  | 46,XY,dup(21)(q22)                                                                                                                                                                                                  |
| 381 | 11 | F | 6.3  | 46,XX,del(7)(q22),-9,dup(21)(q22),+mar[9]                                                                                                                                                                           |
| 382 | 9  | M | 0.6  | 46,XY,dup(21)(q22)[17]                                                                                                                                                                                              |
| 383 | 5  | M | 1.3  | 46,Y,dup(X)(p22.13-                                                                                                                                                                                                 |

|     |    |   |      |                                                                                                                                       |
|-----|----|---|------|---------------------------------------------------------------------------------------------------------------------------------------|
|     |    |   |      | p11.21)dup(X)(q25q28),del(3)(q21.3q21.3),del(9)(p21.3p21.3),i(9)(q10),del(10)(q11.21q11.21),del(11)(q14.3-q24.2),dup(21)(q21.2-q22.3) |
| 384 | 5  | M | 6.6  | 47,XY,+X,dup(21)(q11q22)[8]                                                                                                           |
| 385 | 15 | M | 37.8 | Fail                                                                                                                                  |
| 386 | 14 | M | 14.5 | Fail                                                                                                                                  |
| 387 | 4  | F | 16   | 46,XX,dup(21)(q22)[25]                                                                                                                |
| 388 | 13 | M | 7.6  | 46,XY,t(1;12)(q41;p13),t(8;12)(q24;p13),i(9)(q10),del(16)(q11),dup(21)(q?)[cp]                                                        |
| 389 | 8  | F | 2    | Fail                                                                                                                                  |
| 390 | NA | M | NA   | 47,XY,+X,del(16)(q11),-21,+mar[16]                                                                                                    |
| 391 | NA | M | NA   | 46,XY,-21,+r(?)[3]/46,idem,inv(11)(p15q13)[4]/46,idem,i(8)(q10)[8]                                                                    |
| 392 | NA | M | NA   | 46,XY,ider(21)(q10)add(21)(q22)                                                                                                       |
| 393 | NA | M | NA   | 48,XY,-4,del(8)(p22),add(19)(p13),-21,+4mar[9]                                                                                        |
| 394 | NA | F | NA   | 46,XX,del(13)(q14),add(21)(q22)[6]                                                                                                    |
| 395 | NA | F | NA   | 47,XX,+X,-5,+8,i(17)(q10),add(21)(q22)[10]                                                                                            |
| 396 | NA | F | NA   | 44,XX,-9,add(9)(p13),der(15)t(9;15)(q22;q15),-20,add(20)(q13),add(21)(q22)[16]                                                        |
| 397 | NA | M | NA   | 46,XY,-21,+r[8]                                                                                                                       |
| 398 | NA | M | NA   | 46,XY,del(11)(q21),-19,+mar[8]                                                                                                        |
| 399 | NA | F | NA   | 46,XX,dup(21)(q11.2q22)[14]                                                                                                           |
| 400 | 19 | F | NA   | 44,XX,i(8)(q10),-10,add(11)(q23),add(12)(p13),-14,add(14)(q32),add(15)(q25),+16,add(21)(q22),-22,+mar[5]                              |
| 401 | NA | F | NA   | 48,XX,+X,+10,del(11)(q23),qdp(21)(q11.1q22)[13]                                                                                       |
| 402 | NA | F | NA   | 46,XX,add(9)(q34),ider(21)dup(21)(q22)[10]                                                                                            |
| 403 | 14 | M | NA   | 47,XY,+X,der(3)add(3)(p14)add(3)(q25~26),add(9)(p2?),add(12)(p13),add(14)(q32),add(21)(q22)[10]                                       |
| 404 | 7  | F | NA   | 47,XX,+X,-21,+r[10]                                                                                                                   |
| 405 | 7  | M | NA   | 46,XY,add(5)(q31)[1]/46~47,idem,+10,+11,-21,+r,+2mar[cp6]                                                                             |
| 406 | 13 | M | NA   | 46,XY,del(11)(q22q25),add(21)(q22)[10]                                                                                                |
| 407 | 11 | M | NA   | 47,XY,-21,+r,+mar[10]                                                                                                                 |
| 408 | 6  | M | NA   | 47,XY,del(11)(q22q25),-13,del(20)(p12),add(21)(q22),+1~4mar[cp8]                                                                      |
| 409 | 6  | M | NA   | 48,XY,+X,+14,i(17)(q10),i(21)(q10)[9]                                                                                                 |
| 410 | 17 | M | NA   | 47,XY,add(7)(q32),add(10)(p1?),+21,add(21)(q22),add(22)(q13)[9]                                                                       |



|     |    |   |      |                                                                                                                                                 |
|-----|----|---|------|-------------------------------------------------------------------------------------------------------------------------------------------------|
| 411 | 6  | F | NA   | 45~46,XX,add(21)(q22),inc[cp5]                                                                                                                  |
| 412 | 3  | F | NA   | 46,XX,-10,-15,-21,+4~6mar,inc[cp7]                                                                                                              |
| 413 | 9  | F | 1.8  | Fail                                                                                                                                            |
| 414 | 10 | F | 10   | 46,XX,ider(21)(q10)dup(21)(q?)[6]                                                                                                               |
| 415 | 7  | M | NA   | Fail                                                                                                                                            |
| 416 | 5  | F | 10.4 | 48,XX,add(1)(q?),del(13)(q1?),der(15;21)(q10;q10)dup(15;21)(q?q?),+der(15;21)(q10;q10)dup(15;21)(q?q?)+22,+mar[2]/45,XX,rob(15;21)(q10;q10)c[9] |
| 417 | 11 | M | 3.3  | 46-47,XY,add(1)(q3?)-4,add(9)(q2?),add(11)(q2?),del(13)(q?13),del(20)(q?),dup(21)(q?),+2mar[cp8]                                                |
| 418 | 2  | M | 13.6 | 47,XY,dup(21)(q?),+mar[6]                                                                                                                       |
| 419 | 14 | F | 0.7  | 46,XX[20]                                                                                                                                       |
| 420 | 3  | F | 15   | 45,XX,add(8)(p2?),add(10)(p1?)-13,t(18;20)(q11.2;p11.3),dup(21)(q?)[10]                                                                         |
| 421 | 9  | F | 1.7  | 46,XX[45]                                                                                                                                       |
| 422 | 5  | M | 5.8  | Fail                                                                                                                                            |
| 423 | 14 | F | 14.4 | 46,XX[20]                                                                                                                                       |
| 424 | 9  | M | 1.1  | 46,XY,del(13)(q14),del(16)(q12.1),dup(21)(q?)[9]                                                                                                |
| 425 | 11 | M | 1.5  | 48,XY,+X,t(6;20)(p1?q1?),t(7;9)(p1?p2?),i(9)(q10),+12,dup(21)(q?)[9]                                                                            |
| 426 | 8  | M | 8.3  | 46,XY,t(2;14)(p11.2;q32),der(21)r(21)(p1q?)dup(21)(q?)[8]                                                                                       |
| 427 | 8  | M | 2.8  | 44~46,XY,-2,-5,-7,-9,-10,-12,add(12)(q2?)-21,+4~6mar[cp8]                                                                                       |
| 428 | 9  | M | 1.8  | 46,XY[20]                                                                                                                                       |
| 429 | 3  | M | 5.4  | Fail                                                                                                                                            |
| 430 | 8  | F | 4.9  | 52,XX,+9,-12,-21,+7mar[cp4]                                                                                                                     |
| 431 | 11 | M | 4.3  | 46,XY,add(21)(p11)[4]                                                                                                                           |
| 432 | 8  | F | 15.4 | 46,XX,t(1;5)(p3?2;q3?1),add(21)(q22)[10]                                                                                                        |
| 433 | 8  | F | 10   | 46~47,XX,+X,add(7)(p22),del(11)(q23),del(13)(q12q14),dup(21)(q22),+r[cp8]                                                                       |
| 434 | 10 | F | 10.6 | 46,XX,ider(21)(q10)inv dup(21)(q1?q2?)[9]                                                                                                       |
| 435 | 12 | M | 18.6 | 46,XY,-21,+mar[2]                                                                                                                               |
| 436 | 21 | M | NA   | 46,XY,-21,+mar[3]                                                                                                                               |
| 437 | 10 | F | NA   | 47,XX,+10,der(21)r(21)(q?)dup(21)(q?)[10]                                                                                                       |
| 438 | 10 | M | 8.3  | 46,XY,der(1)t(1;13)(q2?5;q12),del(9)(p2?1),-11,-13,-15,del(16)(q10),-17,-                                                                       |

|     |    |   |      |                                                                                                                        |
|-----|----|---|------|------------------------------------------------------------------------------------------------------------------------|
|     |    |   |      | 21,+3mar[5]/45,XY,rob(15;21)(q10;q10)c[5]                                                                              |
| 439 | 17 | F | NA   | 45,X,del(X)(q22),del(1)(p13),der(9;17)(q10;q10),del(10)(q22),del(11)(q14),add(12)(q24),add(21)(q22)[4]/46,idem,+mar[4] |
| 440 | 13 | F | 3.55 | 46,XX,i(21)(q22)[2]/54,idem,+X,+4,+6,+9,+14,+17,+18[2]                                                                 |
| 441 | 11 | F | 1.8  | Fail                                                                                                                   |
| 442 | 7  | F | 3.9  | Fail                                                                                                                   |
| 443 | 7  | F | 9.1  | 47,XX,+X,-21,+mar[15]                                                                                                  |
| 444 | 8  | F | 5.2  | 46,XX,dup(21)(q22)[6]                                                                                                  |
| 445 | 8  | F | 2.9  | 45,XX,-7,del(19)(q13),+mar[cp9]                                                                                        |
| 446 | 11 | F | 7.1  | 46,X,der(X)add(X)(p2?)add(X)(q2?),der(21)r(21)(p1?q2?)dup(21)(q22)[9]                                                  |
| 447 | 13 | F | 5.02 | 46,XX,t(2;16)(p1?2;q2?3),-21,+mar[5]                                                                                   |
| 448 | 8  | M | 1.3  | 48,XY,+X,dup(21)(q11q22),+dup(21)(q11q22)[7]                                                                           |
| 449 | 7  | F | 17   | 47,XX,+X,der(21)r(21)(q?)dup(21)(q?)[3]                                                                                |
| 450 | 5  | M | 2.1  | 46,XY,dup(21)(q?)[7]                                                                                                   |
| 451 | 15 | F | 1.3  | 46,XX,del(7)(q22q32),dup(21)(q?)[16]                                                                                   |
| 452 | 11 | M | 10.6 | 46,XY,t(1;16)(q23;p13),ider(21)(q10)dup(21)(q?)[3]/51,idem,+X,+3,+10,+14,+21[3]                                        |
| 453 | 11 | M | 6.1  | 46,XY,i(9)(q10),del(11)(q2?1),dup(21)(q?)                                                                              |
| 454 | 13 | F | 3.3  | 45,XX,-7,del(12)(p12),dup(21)(q?)[5]                                                                                   |
| 455 | 6  | F | 5    | 46~47,XX,dup(21)(q?)+mar[cp7]                                                                                          |
| 456 | 7  | F | 15.2 | 45,XX,dup(8)(p?),-11,der(15)t(11;15)(?;q24),der(21)r(21)(q?)dup(21)(q?)[2]                                             |
| 457 | 14 | M | 19   | 46,XY,dup(21)(q?)[4]/46,idem,del(5)(q?),der(15)t(5;15)(q?;q?)[3]                                                       |
| 458 | 10 | F | 1.1  | 46,XX,dup(21)(q?)[2]                                                                                                   |
| 459 | 7  | M | 3    | 45,XY,dic(8;16)(p1?;p1?),del(13)(q?14),dup(21)(q?)[6]/46,idem,der(Y)t(Y;13)(q1?;q?14),+dic(8;16)(p1?;p1?)[2]           |
| 460 | 12 | F | 2.4  | 47,XX,add(7)(q2?)+10,der(21)r(21)(q?)dup(21)(q?)[7]/47,idem,del(12)(p13)[4]                                            |
| 461 | 8  | M | 3.5  | 46,XY,dup(21)(q?)[13]                                                                                                  |
| 462 | 14 | F | 0.5  | 46,XX,t(12;16)(q24;p11),del(15)(q24q26),t(17;20)(p1?3;q11),dup(21)(q?)[6]                                              |
| 463 | 14 | F | 3.4  | 46,XX,del(7)(q22),t(14;22)(q32;q11),dup(21)(q?)[10]                                                                    |
| 464 | 13 | F | 3.4  | 46,XX,dup(21)(q?)[3]/46,idem,del(16)(q1?)[7]                                                                           |
| 465 | 5  | M | 8.3  | 47,XY,-12,dup(21)(q?)+mar1,+mar2[3]                                                                                    |

|     |    |   |      |                                                                                                                  |
|-----|----|---|------|------------------------------------------------------------------------------------------------------------------|
| 466 | 5  | F | 21.8 | 46,XX[24]                                                                                                        |
| 467 | 8  | M | 2.7  | 45,Y,t(X;15)(q2?1;q2?4),dic(12;17)(p1;p1),der(21)r(21)(q?)dup(21)(q?)[4]                                         |
| 468 | 7  | M | 8.8  | 45,XY,t(6;19)(p21;p13),der(7)t(7;15)(p1?;q1?),del(11)(p13),-15,del(16)(q2?),ider(21)(q10)dup(21)(q?)[8]          |
| 469 | 9  | M | 2.1  | 46,XY,der(21)r(21)(q?)dup(21)(q?)[3]                                                                             |
| 470 | 9  | M | 4    | Fail                                                                                                             |
| 471 | 6  | F | 13.9 | 46,XX,dup(21)(q?)[11]/47,idem,+X[1]                                                                              |
| 472 | 6  | F | 1.9  | 46,X,add(X)(q2?),add(3)(q26),del(3)(p12),del(7)(p11),del(11)(q23),add(15)(q22),der(21)dup(21)(q?)[6]             |
| 473 | 10 | M | 80.3 | 45,XY,-11,del(12)(p1?2),der(20)t(11;20)(q?;q?),dup(21)(q?)[21]                                                   |
| 474 | 14 | F | 0.7  | 46,XX,del(9)(p22),dup(21)(q?)[8]                                                                                 |
| 475 | 8  | M | 3.7  | 46,XY,t(8;11)(p?11;q21),del(11)(q?21),der(21)r(21)(q?)dup(21)(q?)[8]                                             |
| 476 | 8  | F | 54.7 | 46,XX,del(1)(q4?),del(6)(q1?5),del(7)(q2?2q3?1),dup(21)(q?)[3]/46,idem,add(6)(q2?)[12]                           |
| 477 | 6  | M | 55.1 | 47,XY,+X,dup(21)(q?)[7]                                                                                          |
| 478 | 9  | M | 2    | 46,XY,ider(21)(q10)dup(21)(q?)[6]                                                                                |
| 479 | 14 | M | 4.2  | 45,XY,add(1)(p36),-2,add(4)(q35),-7,del(12)(p12),del(16)(q?2),-19,der(21)r(21)(q?)dup(21)(q?),+4mar,inc[cp6]     |
| 480 | 13 | M | 2.7  | Fail                                                                                                             |
| 481 | 5  | M | 31   | 47,XY,+X,del(16)(q13),i(17)(q10),ider(21)(q10)dup(21)(q?)[3]/47,idem,add(7)(p1?)[3]                              |
| 482 | 10 | M | 43.6 | 46,XY,t(2;8)(p12;q24),del(9)(p?21),del(13)(q1?),dup(21)(q?)[9]                                                   |
| 483 | 14 | M | 0.5  | 46,XY,del(7)(q22q36),i(der)(21)(q10)dup(21)(q?)[cp3]                                                             |
| 484 | 10 | F | 5.9  | Fail                                                                                                             |
| 485 | 4  | F | 175  | Fail                                                                                                             |
| 486 | 3  | M | 84.2 | 43~44,XY,del(5)(q11q13),der(15;21)(q10;q10)dup(15;21)(q?;q?),del(16)(q22),-20[cp5]/45,XY,rob(15;21)(q10;q10)c[3] |
| 487 | 4  | M | 3.2  | 46,XY,add(13)(q?),ider(21)(q10)dup(21)(q?)[2]/47,idem,+14[1]/48,idem,+8,+14[5]                                   |
| 488 | 8  | M | 1    | 47,XY,+X,-5,-9,add(20)(q?)+21,dup(21)(q?)+mar,inc[7]                                                             |
| 489 | 6  | F | 84.7 | 46,XX,dup(21)(q?)[10]                                                                                            |
| 490 | 7  | F | 25.4 | 46,XX,ider(21)(q10)dup(21)(q?)[13]                                                                               |
| 491 | 12 | F | 1.4  | Fail                                                                                                             |
| 492 | 10 | F | 2.8  | 47,XX,+X,del(9)(p?),-10,del(11)(q13),ider(21)(q10)dup(21)(q?)+mar[cp11]                                          |
| 493 | 6  | F | 3.3  | Fail                                                                                                             |

|     |    |   |       |                                                                                                                                  |
|-----|----|---|-------|----------------------------------------------------------------------------------------------------------------------------------|
| 494 | 13 | M | 117.8 | Fail                                                                                                                             |
| 495 | 15 | M | 1.6   | 46,XY,dup(21)(q?),inc[3]                                                                                                         |
| 496 | 7  | M | 27.4  | 46,XY,i(9)(q10),del(11)(q22q25),add(20)(p1),dup(21)(q?)[10]                                                                      |
| 497 | 14 | M | 3.4   | 47,XY,+X,der(21)r(21)(q?)dup(21)(q?)[4]                                                                                          |
| 498 | 12 | M | 2.5   | 47,XY,+9,der(21)r(21)(q?)dup(21)(q?)                                                                                             |
| 499 | 5  | M | 226   | Fail                                                                                                                             |
| 500 | 11 | F | 10.64 | Fail                                                                                                                             |
| 501 | 8  | M | 7.5   | 46,XY,r(1)(p36q42~44),add(7)(p21),del(10)(q22p25),t(10;14)(q26;q11.2),qdp(21)(q11.2~21q22)[cp9]/46,idem,t(12;15)(p11.2;q13)[cp7] |
| 502 | 7  | M | 12.3  | 46,XY[20]                                                                                                                        |
| 503 | 10 | M | 2.4   | 48,XY,+X,inv(1)(p13q?32),ider(21)(q10)dup(21)(q?)+mar[11]                                                                        |
| 504 | 7  | F | 3     | 45,XX,add(8)(p?2),add(11)(q1?2),-15,-21,+mar[8]                                                                                  |
| 505 | 8  | F | 25.9  | 46,XX,t(7;9;17)(q22;p1?;p1?),del(11)(q23q2?5),dup(21)(?)[7]                                                                      |
| 506 | 10 | F | 130   | Fail                                                                                                                             |
| 507 | 14 | F | 1.3   | Fail                                                                                                                             |
| 508 | 11 | M | 1     | 46,XY,del(6)(q1?2q?21),add(12)(p13),del(14)(q22q32),del(15)(q?15),der(21)r(21)(q?)dup(21)(q?),add(22)(q13)[14]                   |
| 509 | 13 | F | 50.1  | 46,XX[20]                                                                                                                        |
| 510 | 9  | M | 1.7   | 46,XY,t(6;9)(p23;q32)c                                                                                                           |
| 511 | 10 | F | 6     | 46,X,add(X)(q26-q28),dup(21)(q?)[8]                                                                                              |
| 512 | 10 | M | 12.7  | 47,XY,dup(21)(q?)+dup(21)(q?)[6]                                                                                                 |
| 513 | 20 | M | 5.8   | 46,XY,del(7)(p1?5),t(8;22)(q1?1;q13),dup(21)(q?)[17]                                                                             |
| 514 | 18 | M | 2.3   | 46,XY,del(11)(q23),-13,-16,dup(21)(q?)+mar1,+mar2[cp4]                                                                           |
| 515 | 30 | F | 4.6   | 45,XX,-21,+mar,inc[2]                                                                                                            |
| 516 | 21 | M | 6.7   | 46,XY,del(7)(q22),dup(21)(q?)[5]                                                                                                 |
| 517 | 23 | F | 5.3   | Fail                                                                                                                             |
| 518 | 20 | M | 5.2   | 47,XX,+X,del(7)(q2?),add(8)(q2?),der(21)dup(21)(q?)[11]                                                                          |
| 519 | 23 | F | 2.1   | 47,XY,der(21)r(21)(q?)dup(21)(q?)+mar,inc[5]                                                                                     |
| 520 | 13 | M | 2.3   | 47,XY,+21[18]                                                                                                                    |

|     |    |   |      |                                                                                            |
|-----|----|---|------|--------------------------------------------------------------------------------------------|
| 521 | 26 | M | 3.7  | 46,XY,del(7)(q?),der(9)t(9;13)(p24;q14),ider(21)dup(21)(q22q22)[9]                         |
| 522 | 13 | M | 2.3  | 47,XY,+Y,dup(21)(q21q22)[2]                                                                |
| 523 | 18 | M | 24   | 46,XY,t(2;4)(q35;q32),der(7)t(7;8)(q36;q22),del(9)(p13p23),ider(21)(q10)dup(21)(q21q22)[4] |
| 524 | 17 | F | 3.5  | Fail                                                                                       |
| 525 | 7  | M | 34.2 | 46,XY,add(21)(q22)                                                                         |
| 526 | 8  | M | 9.4  | Fail                                                                                       |
| 527 | 15 | M | 15.8 | 46,XY,del(7)(q31),der(21)r(21)(q?)dup(21)(q?)[20]                                          |
| 528 | 11 | M | 0.7  | 46,XY,add(21)(q22)                                                                         |
| 529 | 2  | F | 1    | Fail                                                                                       |
| 530 | 13 | M | NA   | 44,XY,del(1)(p33),-4,i(9)(q10),-17,t(19;?)(q13.3;?),dup(21)(q?),+1~2mar [cp16]             |
